# Supplementary material for: ERK1 Is a Regulatory Kinase Coordinating ERK2 Function in Colon Adenocarcinoma
Source: Preprints.org preprint supplement (doi:10.20944/preprints202312.0533.v1), 2023-12-08
Supplement: Supplementary file 2 [file supplementary]

**Supplemental table S1.** PCR primers.


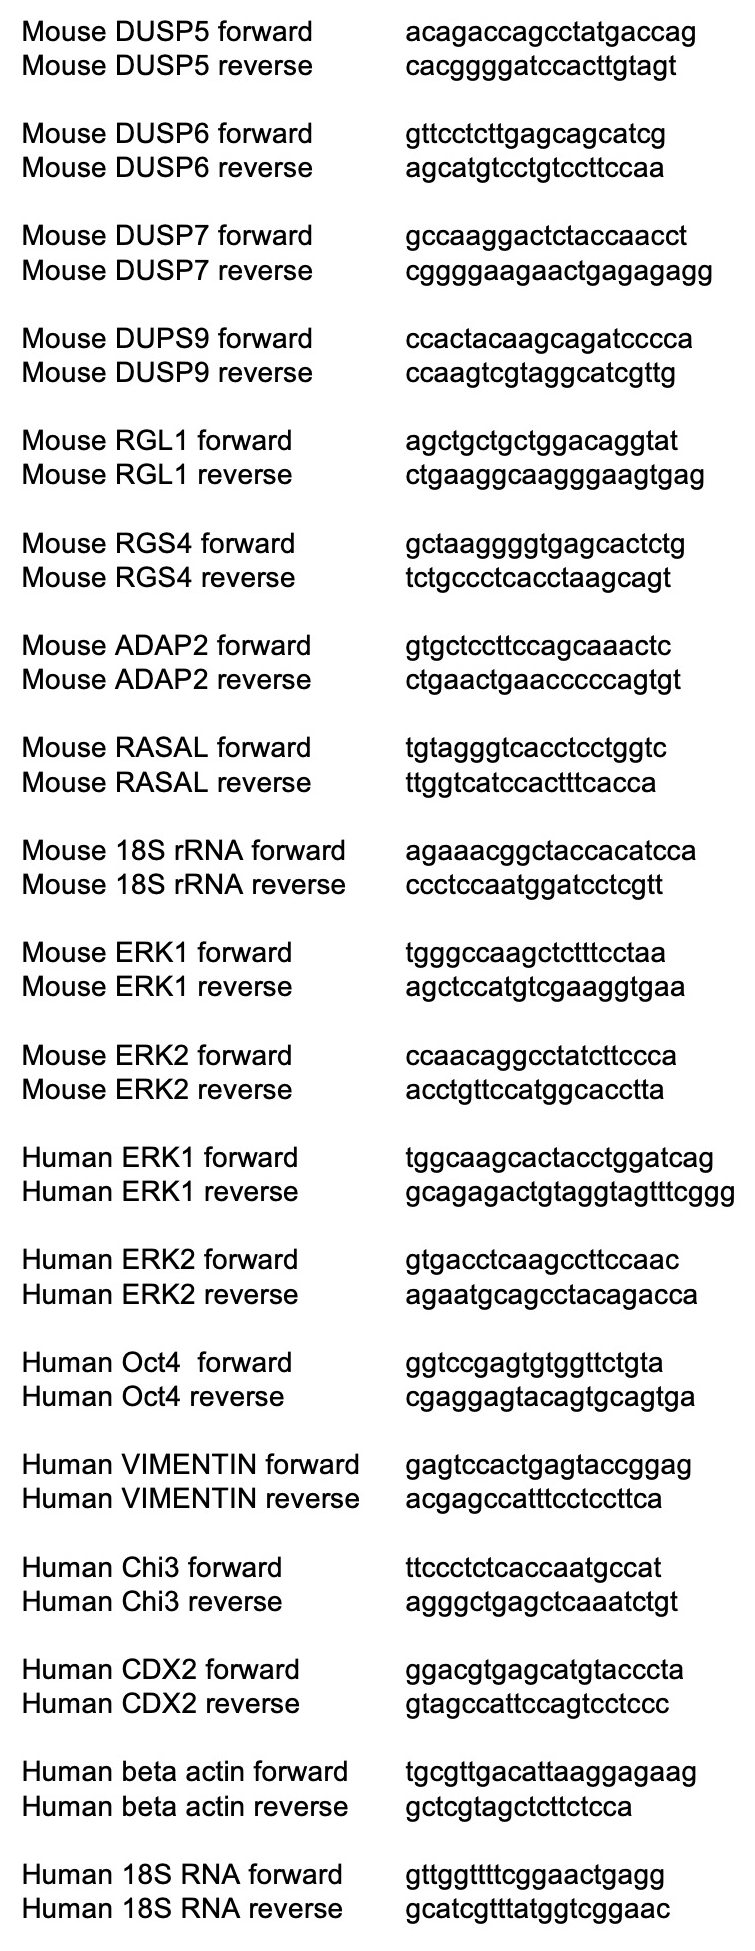


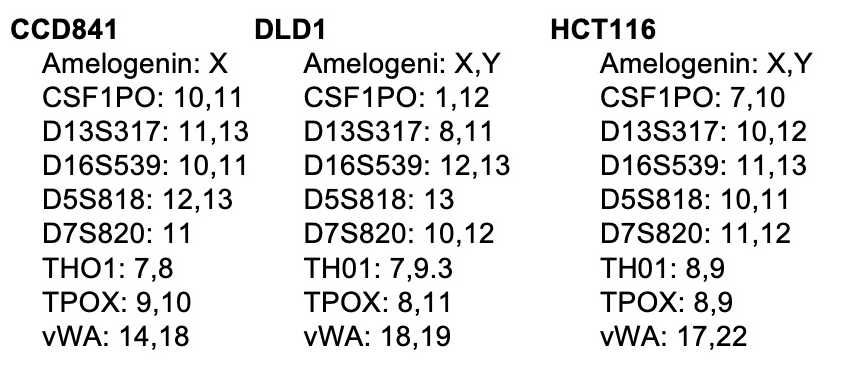


**Supplemental Figure S1.** STRs of cell CCD841, DLD1, and HCT116 showing marked differences between cell lines.


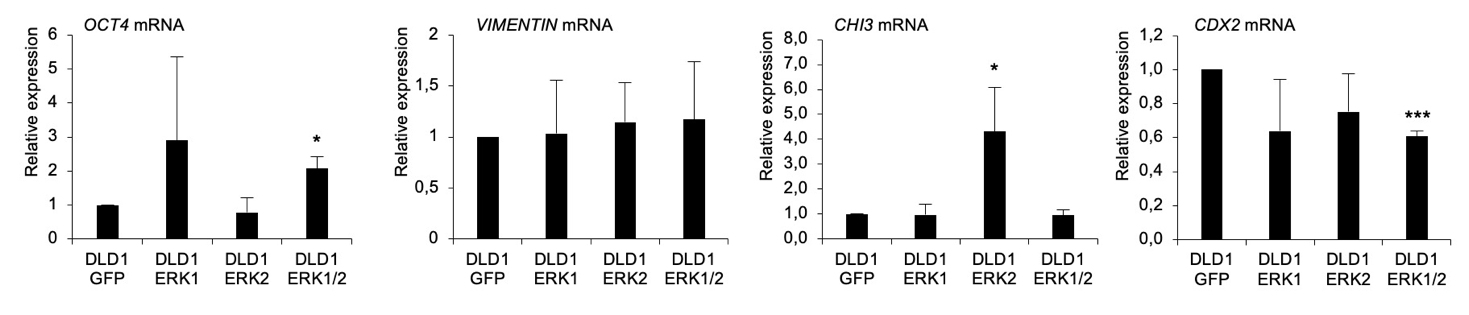


**Supplemental Figure S2.** *OCT4*, *VIMENTIN*, *CHI3*, and *CDX2* differentiation marker expression in DLD1 cells expressing *GFP*, *ERK1*, *ERK2*, or *ERK1/2*. The data did not show any effect for ERK1 in the differentiation of the cells. The p-values are *p<0.05, **p<0.01, ***p<0.001, and ****p<0.0001. The p-value was determined using *GFP* expressing cells as a comparison control.
